# Supplementary material for: Parental Feeding Styles and Their Association With Complementary Feeding Practices and Growth in Mexican Children
Source: Frontiers journal article supplement (doi:10.3389/fped.2021.786397), 2021-12-21
Supplement: Data_Sheet_1.pdf [file Data_Sheet_1.pdf]

## SUPPLEMENTARY TABLES

**Supplementary Table 1.**

*Classification and Components of Infant Feeding Practices in Mexican Infants of the MAS-Lactancia Cohort (2016-2018)*

| Component I. BF           | Definition / criteria                                                                                                                                                                                                                                                                                                                                                                                                                                                                                                                                         |
|---------------------------|---------------------------------------------------------------------------------------------------------------------------------------------------------------------------------------------------------------------------------------------------------------------------------------------------------------------------------------------------------------------------------------------------------------------------------------------------------------------------------------------------------------------------------------------------------------|
| Exclusive breastfeeding   | Only breast milk without other liquids or food. Whey, medicines, vitamins, and minerals are allowed.<br>Adequate: up to six months.                                                                                                                                                                                                                                                                                                                                                                                                                           |
| Partial breastfeeding     | Formula, other milks, and breast milk (without food).<br>Adequate: from six months of age, but not older than 6.5 months                                                                                                                                                                                                                                                                                                                                                                                                                                      |
| Mixed breastfeeding       | Breast milk and food (including other milks).<br>Adequate: From six months of age.                                                                                                                                                                                                                                                                                                                                                                                                                                                                            |
| No breastfeeding          | Not having reported consuming breast milk<br>Inadequate for any age group.                                                                                                                                                                                                                                                                                                                                                                                                                                                                                    |
| Component II. CF          | Definition / criteria                                                                                                                                                                                                                                                                                                                                                                                                                                                                                                                                         |
| Age at introduction of CF | Receives solid or semi-solid foods between four and six months of age                                                                                                                                                                                                                                                                                                                                                                                                                                                                                         |
| SSB consumed              | Presence of sugar-sweetened beverages (e.g., industrialized fruit juices, cola, drinkable yogurt, etc.) in infant diet                                                                                                                                                                                                                                                                                                                                                                                                                                        |
| UP <sup>1</sup> consumed  | Presence of ultra-processed foods (industrial formulations made from substances derived from food or synthesized from other organic sources) in infant diet, including but not limited to the following:<br>Industrialized cereals: cookies, pastries, crackers, sliced bread<br>Lunchmeats: ham, sausage<br>Dairy: processed cheese, infant formula, cream<br>Sugars and fats: candy, chocolate, mayonnaise, seasoning<br>Fast foods: hamburger, pizza<br>Baby foods: soup, porridge, puree<br>Others: canned food, industrialized chicken broth, fried food |

**Supplementary Table 1.***Classification and Components of Infant Feeding Practices in Mexican Infants of the MAS-Lactancia Cohort (2016-2018)*

| Food diversity <sup>2</sup> | Receives at least four food groups (for infants who receive BF) and at least five groups (for infants who consume milk formula). |                                                                                                                                                                                                                                                           |
|-----------------------------|----------------------------------------------------------------------------------------------------------------------------------|-----------------------------------------------------------------------------------------------------------------------------------------------------------------------------------------------------------------------------------------------------------|
| CFP classification          | Six months                                                                                                                       | Nine months                                                                                                                                                                                                                                               |
| Adequate                    | Adequate BF, absence of SSB and UP foods, and age at introduction of CF more than four months.                                   | Adequate BF, food diversity, absence of SSB and UP foods.                                                                                                                                                                                                 |
| Moderately Adequate         | Adequate BF, absence of SSB, age at introduction of CF more than four months, but with consumption of UP foods.                  | Adequate BF, absence of SSB, but without food diversity and with consumption of UP foods.<br>Adequate BF, absence of SSB and UP foods, but without food diversity.<br>Adequate BF, absence of SSB, with food diversity, but with consumption of UP foods. |
| Inadequate                  | Inadequate BF<br>Any type of breastfeeding with the presence of SSB or age at introduction of CF before four months of age.      | Inadequate BF<br>Any type of breastfeeding with the presence of SSB.                                                                                                                                                                                      |

CFP: Complementary feeding practices, BF: Breastfeeding, CF: Complementary feeding, SSB: Sugar-sweetened beverages; UP: Ultra-processed foods.

<sup>1</sup>NOVA system of food classification. <sup>2</sup>The food diversity indicator was considered only at evaluations in the ninth month because at six months infants were initiating CF.

**Supplementary Table 2.***Structure of the Questionnaire on Parental Feeding Styles Applied to Participant Mothers*

| Scales and sub-constructs                                                                            | Components     | Thompson et al. (2009)                                                                                                                                                                                                                                                                             |
|------------------------------------------------------------------------------------------------------|----------------|----------------------------------------------------------------------------------------------------------------------------------------------------------------------------------------------------------------------------------------------------------------------------------------------------|
| Pressuring feeding style                                                                             |                |                                                                                                                                                                                                                                                                                                    |
| Pressuring to finish<br>(Parents control feeding due to concern that the child is eating too little) | Behavior Items | PR1 Try to get (child) to finish his/her food<br>PR2 If (child) seems full, encourage to finish anyway<br>PR3 Try to get (child) to finish breastmilk or formula<br>PR4 Try to get (child) to eat even if not hungry<br>PR6 Praise after each bite to encourage finish food                        |
|                                                                                                      | Belief Items   | PR7 Important for toddler finish all food on his/her plate<br>PR8 Important for child finish all milk in his/her bottle                                                                                                                                                                            |
| Pressuring to eat cereal<br>(Parents use infant cereal to fill up or calm the child)                 | Behavior Items | PR11 Give/gave (child) cereal in the bottle                                                                                                                                                                                                                                                        |
|                                                                                                      | Belief Items   | PR12 Cereal in bottle helps child sleep through the night<br>PR13 Putting cereal in bottle is good b/c it helps infant feel full<br>PR14 An infant <6 mo needs more than formula or breastmilk to be full<br>PR15 An infant <6 mo needs more than formula or breastmilk to sleep through the night |
| Pressuring to soothe<br>(The parents feed the child to calm him)                                     | Behavior Items | PR16 When (child) cries, immediately feed him/her                                                                                                                                                                                                                                                  |
|                                                                                                      | Belief Items   | PR17 Best way to make infant stop crying is to feed him/her<br>PR18 Best way to make toddler stop crying is to feed him/her<br>PR19 When infant cries it usually means s/he needs to be fed                                                                                                        |
| Restrictive                                                                                          |                |                                                                                                                                                                                                                                                                                                    |
| Restrictive in quantity<br>(Parents limits quantities of all foods)                                  | Behavior Items | RS1 I carefully control how much (child) eats<br>RS2 I am very careful not to feed (child) too much                                                                                                                                                                                                |
|                                                                                                      | Belief Items   | RS3 Important parent has rules re: how much child eat<br>RS4 Important parent decides how much infant should eat                                                                                                                                                                                   |
| Restrictive in quality<br>(Parents limit the child's diet to healthy foods)                          | Behavior Items | RS5 I let (child) eat fast food<br>RS6 I let (child) eat junk food                                                                                                                                                                                                                                 |
|                                                                                                      | Belief Items   | RS7 A child should never eat fast food<br>RS8 An infant should never eat fast food                                                                                                                                                                                                                 |

**Supplementary Table 2.***Structure of the Questionnaire on Parental Feeding Styles Applied to Participant Mothers*

|                                                                                                |                |                                                                                     |
|------------------------------------------------------------------------------------------------|----------------|-------------------------------------------------------------------------------------|
|                                                                                                |                | RS9 A child should never eat sugary food like cookies                               |
|                                                                                                |                | RS10 A child should never eat junk food like chips                                  |
| Responsive                                                                                     |                |                                                                                     |
| Responsive in satiety<br>(The parent is attentive to the child's signals while setting limits) | Behavior Items | RP1 (Child) lets me know when s/he is full                                          |
|                                                                                                |                | RP2 (Child) lets me knows when s/he is hungry                                       |
|                                                                                                |                | RP3 I let (child) decide how much to eat                                            |
|                                                                                                |                | RP4 I pay attention when (child) seems to be telling me that s/he is full or hungry |
|                                                                                                |                | RP5 I allow (child) to eat when s/he is hungry                                      |
| Responsive in attention<br>(Parents encourage exploration in a positive environment)           | Belief Items   | RP6 Child knows when s/he is full                                                   |
|                                                                                                |                | RP7 Child knows when hungry, needs to eat                                           |
|                                                                                                | Behavior Items | RP8 Talk to (child) to encourage to drink formula/breastmilk                        |
|                                                                                                |                | RP9 Talk to (child) to encourage him/her to eat                                     |
|                                                                                                | Belief Items   | RP10 Show (child) how to eat by taking a bite or pretending to                      |
|                                                                                                |                | RP11 I will retry new foods if they are rejected at first                           |
|                                                                                                |                | RP12 Important to help or encourage a toddler to eat                                |

**Supplementary Table 3.**

Baseline Characteristics of Mothers in the Study Sample versus Mothers Recruited from the MAS- Lactancia Cohort

| Continuous variables     | Study sample six months |            | Recruited sample |            |         | Study sample nine months |            | Recruited sample |            |         |
|--------------------------|-------------------------|------------|------------------|------------|---------|--------------------------|------------|------------------|------------|---------|
|                          | n                       | M (SD)/%   | n                | M (SD)/%   | p value | n                        | M(SD)/%    | n                | M(SD)/%    | p value |
| Age (years)              | 259                     | 27.0 (5.0) | 699              | 26.3 (5.2) | 0.07    | 234                      | 27.3 (5.0) | 738              | 26.3 (5.2) | 0.01    |
| Number of children       | 259                     | 0.7 (0.9)  | 686              | 0.7 (0.9)  | 0.58    | 234                      | 0.7 (0.8)  | 725              | 0.7 (0.9)  | 0.71    |
| Formal education (years) | 259                     | 16.4 (3.6) | 690              | 16.3 (3.6) | 0.68    | 234                      | 16.7 (3.6) | 729              | 16.2 (3.6) | 0.06    |
| Categorical variables    |                         |            |                  |            |         |                          |            |                  |            |         |
| Employed                 | 259                     | 56.3       | 691              | 57.3       | 0.10    | 234                      | 57.7       | 730              | 56.6       | 0.28    |
| With couple              | 258                     | 88.4       | 695              | 85.2       | 0.21    | 234                      | 83.8       | 734              | 85.2       | 0.13    |
| Household Wealth Index   | 241                     | 100.0      | 645              | 100.0      | 0.70    | 218                      | 100.0      | 681              | 100.0      | 0.27    |
| Tertile 1                | 76                      | 31.5       | 220              | 34.5       |         | 63                       | 28.9       | 236              | 34.7       |         |
| Tertile 2                | 86                      | 35.7       | 212              | 32.9       |         | 76                       | 34.9       | 225              | 33.0       |         |
| Tertile 3                | 79                      | 32.8       | 213              | 33.0       |         | 79                       | 36.2       | 220              | 32.3       |         |

Note: Student t-test was applied and p-values are bolded if significant a  $p < 0.05$ . Chi-square test or Fisher's exact test were applied and p-values are bolded if significant a  $p < 0.05$ .

Sample sizes differ due to missing values in variables

**Supplementary Table 4.**

*Infant Age at Introduction of Complementary Foods by Formula Consumption*

|                           | Both        |     | Without formula |     | With formula |     | <i>p</i> -value |
|---------------------------|-------------|-----|-----------------|-----|--------------|-----|-----------------|
|                           | M (SD)      | n   | M (SD)          | n   | M (SD)       | n   |                 |
| Age at introduction of CF | 4.28 (2.24) | 263 | 5.79 (0.75)     | 111 | 3.17 (2.33)  | 152 | <b>&lt;0.01</b> |

*Note:* *p*-values are bolded if significant a *p* < 0.05.

CF: Complementary feeding. Student *t*-test for mean differences between formula and non-formula categories

**Supplementary Table 5.***Longitudinal Association Between Complementary Feeding Practices and Growth, with Parental Feeding Style Sub-Constructs*

| Complementary Feeding Practices <sup>2</sup> |                     |                   |                 |            |                   |                   | Growth <sup>3</sup>                    |                   |                   |
|----------------------------------------------|---------------------|-------------------|-----------------|------------|-------------------|-------------------|----------------------------------------|-------------------|-------------------|
| PFS sub-constructs <sup>1</sup>              | Moderately Adequate |                   |                 | Inadequate |                   |                   | Weight-for-length z-score <sup>4</sup> |                   |                   |
|                                              | OR                  | CI 95%<br>(LL,UL) | <i>p</i> -value | OR         | CI 95%<br>(LL,UL) | <i>p</i> -value   | β                                      | CI 95%<br>(LL,UL) | <i>p</i> -value   |
| Pressuring to finish                         |                     |                   |                 |            |                   | 0.81 <sup>‡</sup> |                                        |                   | 0.07 <sup>‡</sup> |
| Increase <sup>†</sup>                        | 0.54                | (0.09, 03.07)     | 0.49            | 0.73       | (0.14, 3.81)      | 0.71              | -0.11                                  | (-0.33, 0.11)     | 0.34              |
| Decrease <sup>†</sup>                        | 0.97                | (0.14, 6.74)      | 0.97            | 0.90       | (0.14, 5.88)      | 0.91              | -0.28                                  | (-0.50, -0.06)    | <b>0.01</b>       |
| Pressuring to eat cereal                     |                     |                   |                 |            |                   | 0.68 <sup>‡</sup> |                                        |                   | 0.25 <sup>‡</sup> |
| Increase <sup>†</sup>                        | 1.23                | (0.23, 06.61)     | 0.81            | 0.54       | (0.11, 2.67)      | 0.45              | 0.04                                   | (-0.18, 0.27)     | 0.70              |
| Decrease <sup>†</sup>                        | 0.97                | (0.13, 07.22)     | 0.97            | 0.68       | (0.10, 4.68)      | 0.69              | 0.11                                   | (-0.11, 0.34)     | 0.32              |
| Pressuring to soothe                         |                     |                   |                 |            |                   | 0.74 <sup>‡</sup> |                                        |                   | 0.26 <sup>‡</sup> |
| Increase <sup>†</sup>                        | 2.18                | (0.35, 13.66)     | 0.40            | 1.66       | (0.28, 9.81)      | 0.58              | -0.10                                  | (-0.32, 0.12)     | 0.37              |
| Decrease <sup>†</sup>                        | 4.11                | (0.37, 45.23)     | 0.25            | 3.40       | (0.33, 34.85)     | 0.30              | -0.02                                  | (-0.26, 0.22)     | 0.88              |
| Restrictive in quality                       |                     |                   |                 |            |                   | 0.74 <sup>‡</sup> |                                        |                   | 0.29 <sup>‡</sup> |
| Increase <sup>†</sup>                        | 1.49                | (0.27, 08.10)     | 0.65            | 1.08       | (0.21, 5.47)      | 0.93              | -0.05                                  | (-0.28, 0.18)     | 0.66              |
| Decrease <sup>†</sup>                        | 2.53                | (0.38, 16.66)     | 0.33            | 2.85       | (0.47, 17.25)     | 0.25              | -0.03                                  | (-0.26, 0.19)     | 0.76              |
| Restrictive in quantity                      |                     |                   |                 |            |                   | 0.30 <sup>‡</sup> |                                        |                   | 0.05 <sup>‡</sup> |
| Increase <sup>†</sup>                        | 0.26                | (0.05, 01.47)     | 0.13            | 0.97       | (0.20, 4.71)      | 0.97              | -0.21                                  | (-0.43, 0.01)     | 0.06              |
| Decrease <sup>†</sup>                        | 2.26                | (0.22, 23.79)     | 0.50            | 4.88       | (0.49, 48.28)     | 0.18              | 0.13                                   | (-0.09, 0.35)     | 0.25              |
| Responsive to satiety                        |                     |                   |                 |            |                   | 0.54 <sup>‡</sup> |                                        |                   | 0.26 <sup>‡</sup> |
| Increase <sup>†</sup>                        | 0.34                | (0.06, 01.93)     | 0.23            | 0.54       | (0.10, 2.86)      | 0.47              | 0.05                                   | (-0.16, 0.25)     | 0.67              |
| Decrease <sup>†</sup>                        | 2.67                | (0.21, 33.50)     | 0.45            | 4.50       | (0.38, 53.16)     | 0.23              | 0.11                                   | (-0.14, 0.36)     | 0.40              |
| Responsive in attention                      |                     |                   |                 |            |                   | 0.80 <sup>‡</sup> |                                        |                   | 0.23 <sup>‡</sup> |
| Increase <sup>†</sup>                        | 0.71                | (0.12, 04.37)     | 0.71            | 0.75       | (0.13, 4.24)      | 0.74              | -0.10                                  | (-0.32, 0.12)     | 0.37              |
| Decrease <sup>†</sup>                        | 0.56                | (0.09, 03.59)     | 0.54            | 0.43       | (0.07, 2.63)      | 0.36              | -0.12                                  | (-0.35, 0.12)     | 0.32              |

Note: *p*-values are bolded if significant a *p* < 0.05.

<sup>1</sup>Assessment of the seven parental feeding style sub-constructs corresponding to pressuring, restrictive and responsive feeding styles. <sup>2</sup>Multinomial logistic regression models adjusted by morbidity, birthweight, type of caregiver, BMI Z-score, educational background, number of children, BMI at recruitment and

**Supplementary Table 5.**

*Longitudinal Association Between Complementary Feeding Practices and Growth, with Parental Feeding Style Sub-Constructs*

---

mother's Household Wealth Index (HWI) tertile, with adequate complementary feeding practices as the reference category <sup>3</sup>Lineal regression models adjusted by the same covariates mentioned previously, except by BMI Z-scores, and the addition of "type of breastfeeding", <sup>4</sup>Differences in weight-for-length Z-score between nine and six months. PFS: Parental feeding styles, OR: Odds ratio, CI: Confident intervals; LL: Lower limit; UL: Upper limit., <sup>†</sup>Versus without change between six and nine months as reference category in regression model, <sup>\*</sup>*p*-value of the global model.
